# Supplementary material for: Targeting endothelin receptor signalling overcomes heterogeneity driven therapy failure
Source: PubMed Central journal article supplement (PMC5538298; doi:10.15252/emmm.201607156), 2017-06-12

**Source Data.** Immunoblots from Figure 2  
Dashed outline indicates blot area presented in figure.

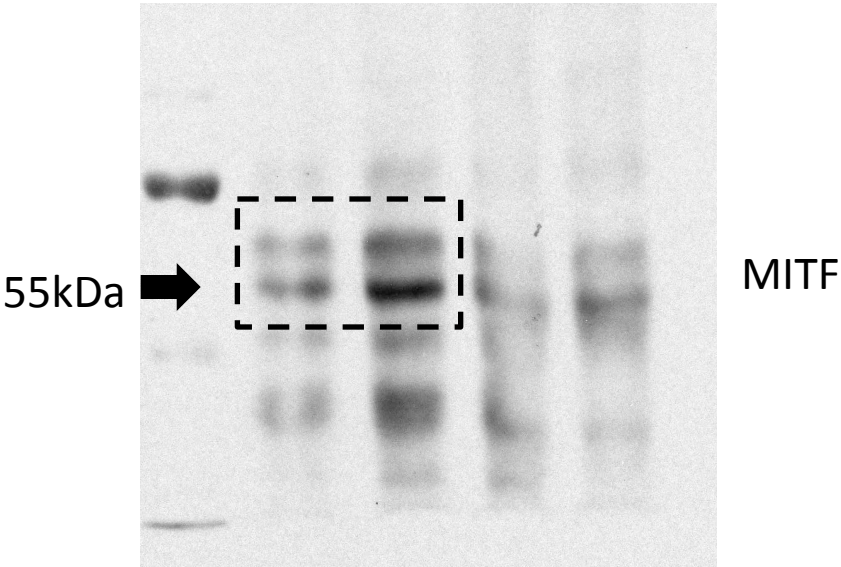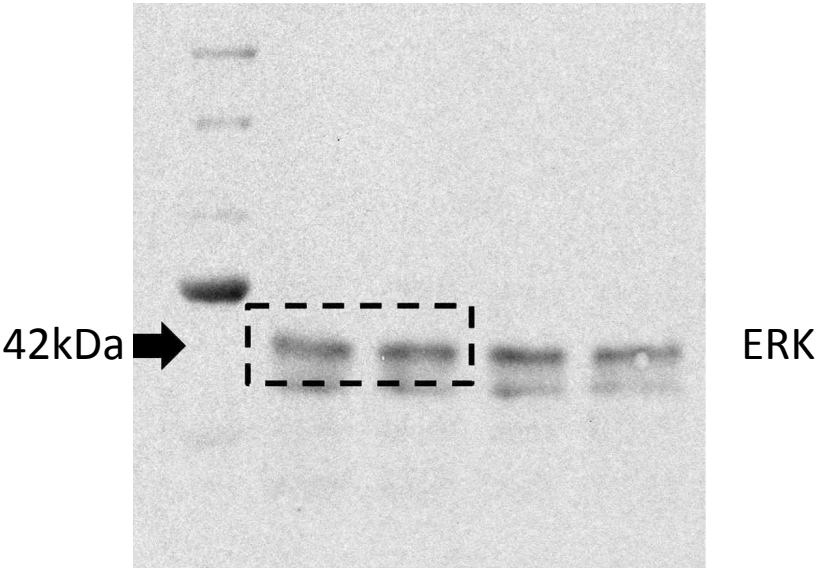

Supplement: EMMM-9-1011-s004.pdf [file EMMM-9-1011-s004.pdf]
